# Supplementary material
Source: bioRxiv or medRxiv preprint supplement (https://www.biorxiv.org/highwire/filestream/92253/field_highwire_adjunct_files/1/299727-2.pdf)

# Supplementary Figure 2

**A**

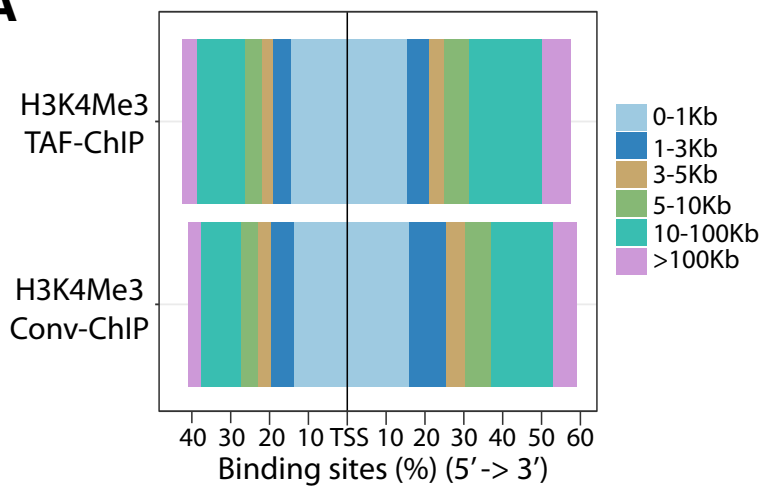

**B**

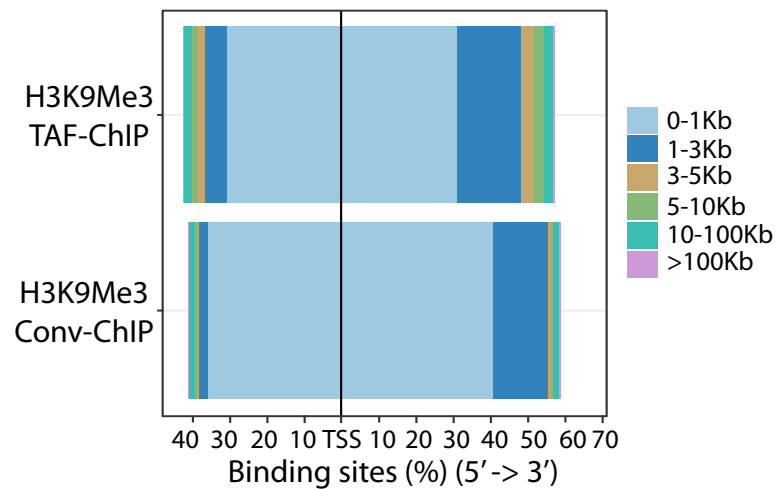

**C**

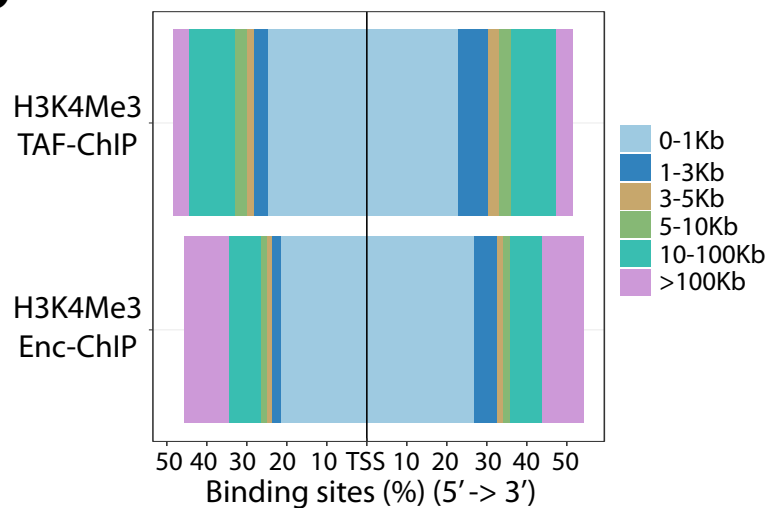

**D**

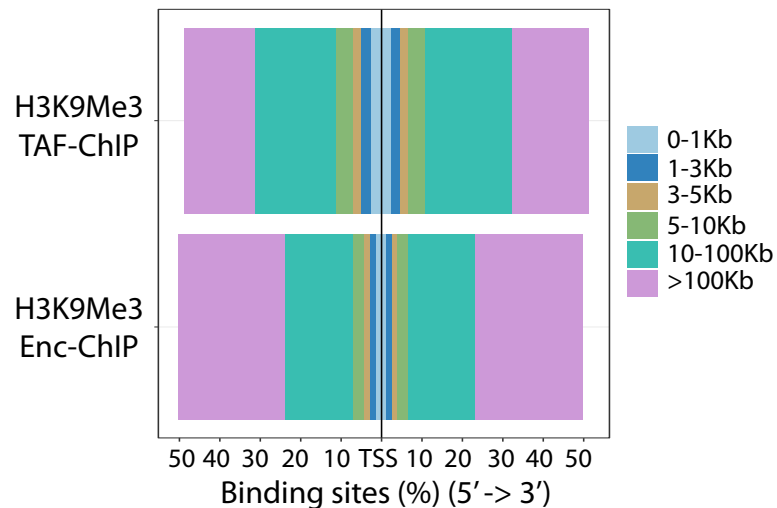

Supplement: Supplementary file [file 299727-2.pdf]
